# Supplementary material for: Human IL-10-producing B cells have diverse states that are induced from multiple B cell subsets
Source: PubMed Central journal article supplement — Cell Rep. Author manuscript; Available in PMC 2022 May 14. (PMC9107325; doi:10.1016/j.celrep.2022.110728), 2022-04-19
Supplement: NIHMS1800008-supplement-1.pdf [file NIHMS1800008-supplement-1.pdf]

**Cell Reports, Volume 39**

**Supplemental information**

**Human IL-10-producing B cells have diverse states  
that are induced from multiple B cell subsets**

**Marla C. Glass, David R. Glass, John-Paul Oliveria, Berenice Mbiribindi, Carlos O. Esquivel, Sheri M. Krams, Sean C. Bendall, and Olivia M. Martinez**

# Supplemental Figure 1

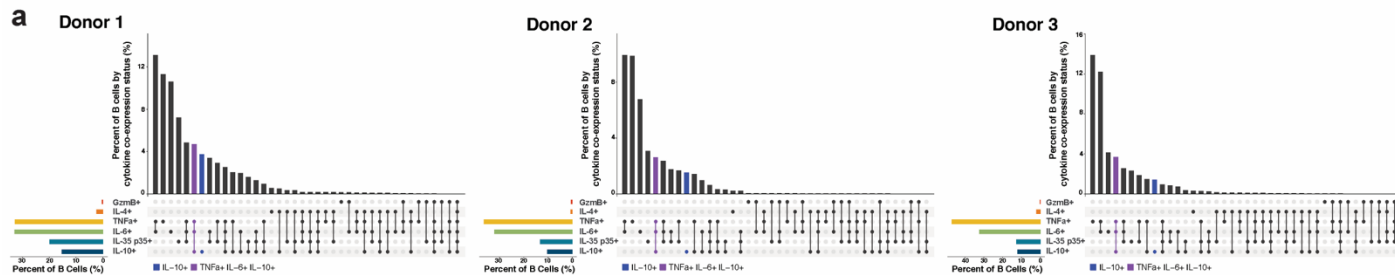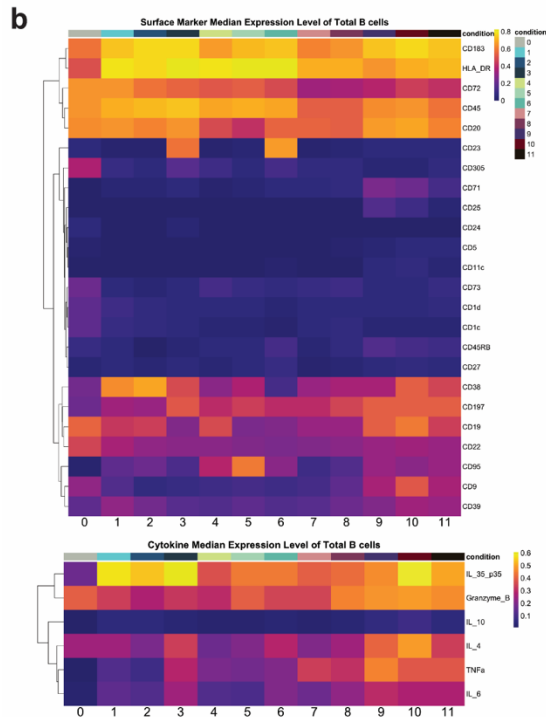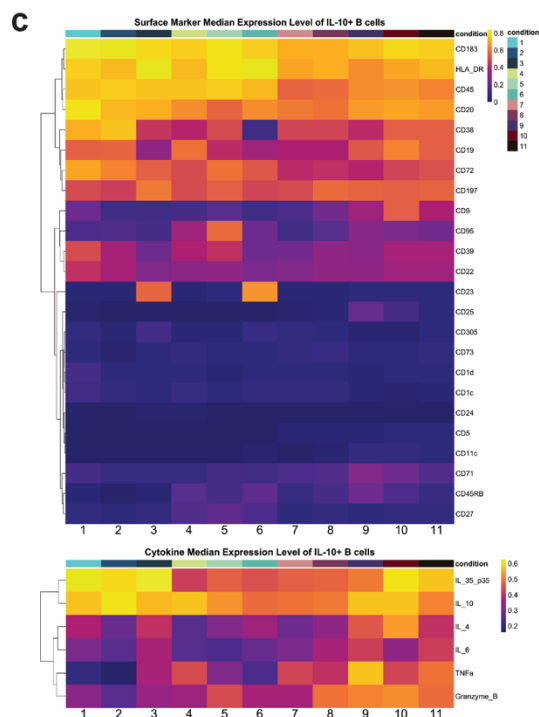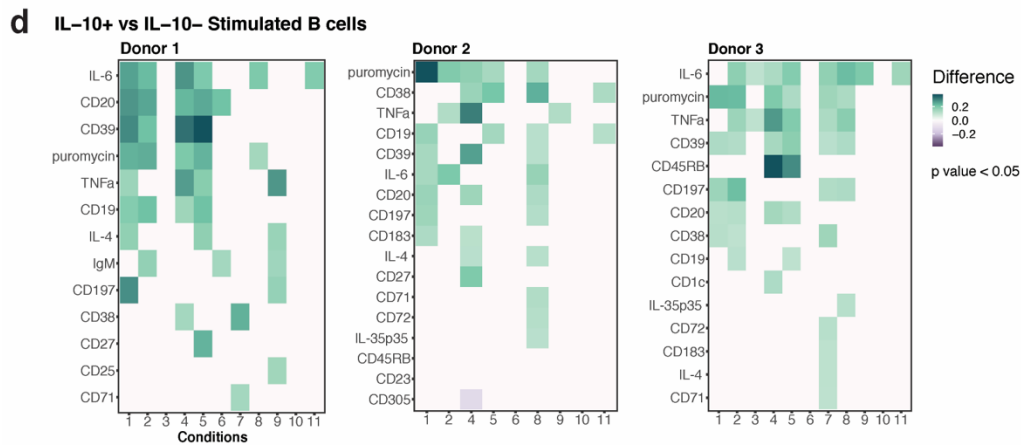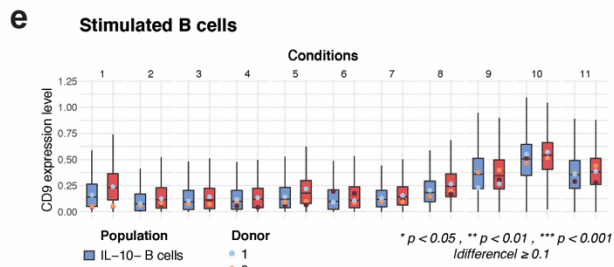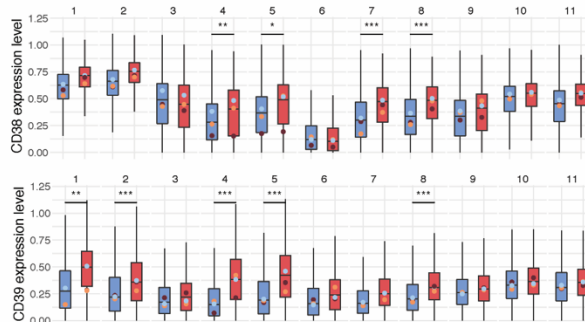

**Figure S1.** Surface marker and cytokine expression of unstimulated and stimulated total B cells and IL-10<sup>+</sup> B cells from stimulation screen. Related to Figure 1.

- (A) Upper bar graphs indicate the percent of stimulated B cells by cytokine (IL-4, TNF $\alpha$ , IL-6, IL-35p35, IL-10) and GzmB expression status, as determined by Boolean gating of cytokine-positive cells, for each individual. Cytokine and GzmB co-expression status of populations are defined in the lower dot plot panels. Left lower bar graphs depict percent of cytokine/GzmB-positive B cells regardless of co-expression, across all stimulation conditions. Data was subsampled equally by condition for each individual donor.
- (B) Median surface marker (top panel) and cytokine (lower panel) expression of total B cells in the unstimulated condition (0) and each stimulated condition (1-11).
- (C) Median surface marker (top panel) and cytokine (lower panel) expression of IL-10<sup>+</sup> B cells from stimulated conditions 1-11.
- (D) Relative difference in median expression of surface markers and cytokines in IL-10<sup>+</sup> versus IL-10<sup>-</sup> stimulated B cells by activating condition (1-11; x axis) and by individual (heatmap panels). Expression only shown for markers and cytokines with difference greater than or equal to 0.1 and a p value less than 0.05. P values denote result of Kolmogorov-Smirnov test with Bonferroni multiple hypothesis correcting.
- (E) Expression levels of CD9, CD38 and CD39 for IL-10<sup>-</sup> (blue) versus IL-10<sup>+</sup> (red) B cells by stimulation condition. P values denote result of Kolmogorov-Smirnov test with Bonferroni multiple hypothesis correcting. Line depicts median, colored dots represent median expression for each individual donor, box depicts interquartile range (IQR), and whiskers depict IQR+/- 1.5\*IQR. \* p < 0.05, \*\* p < 0.01, and \*\*\* p < 0.001.

## Supplemental Figure 2

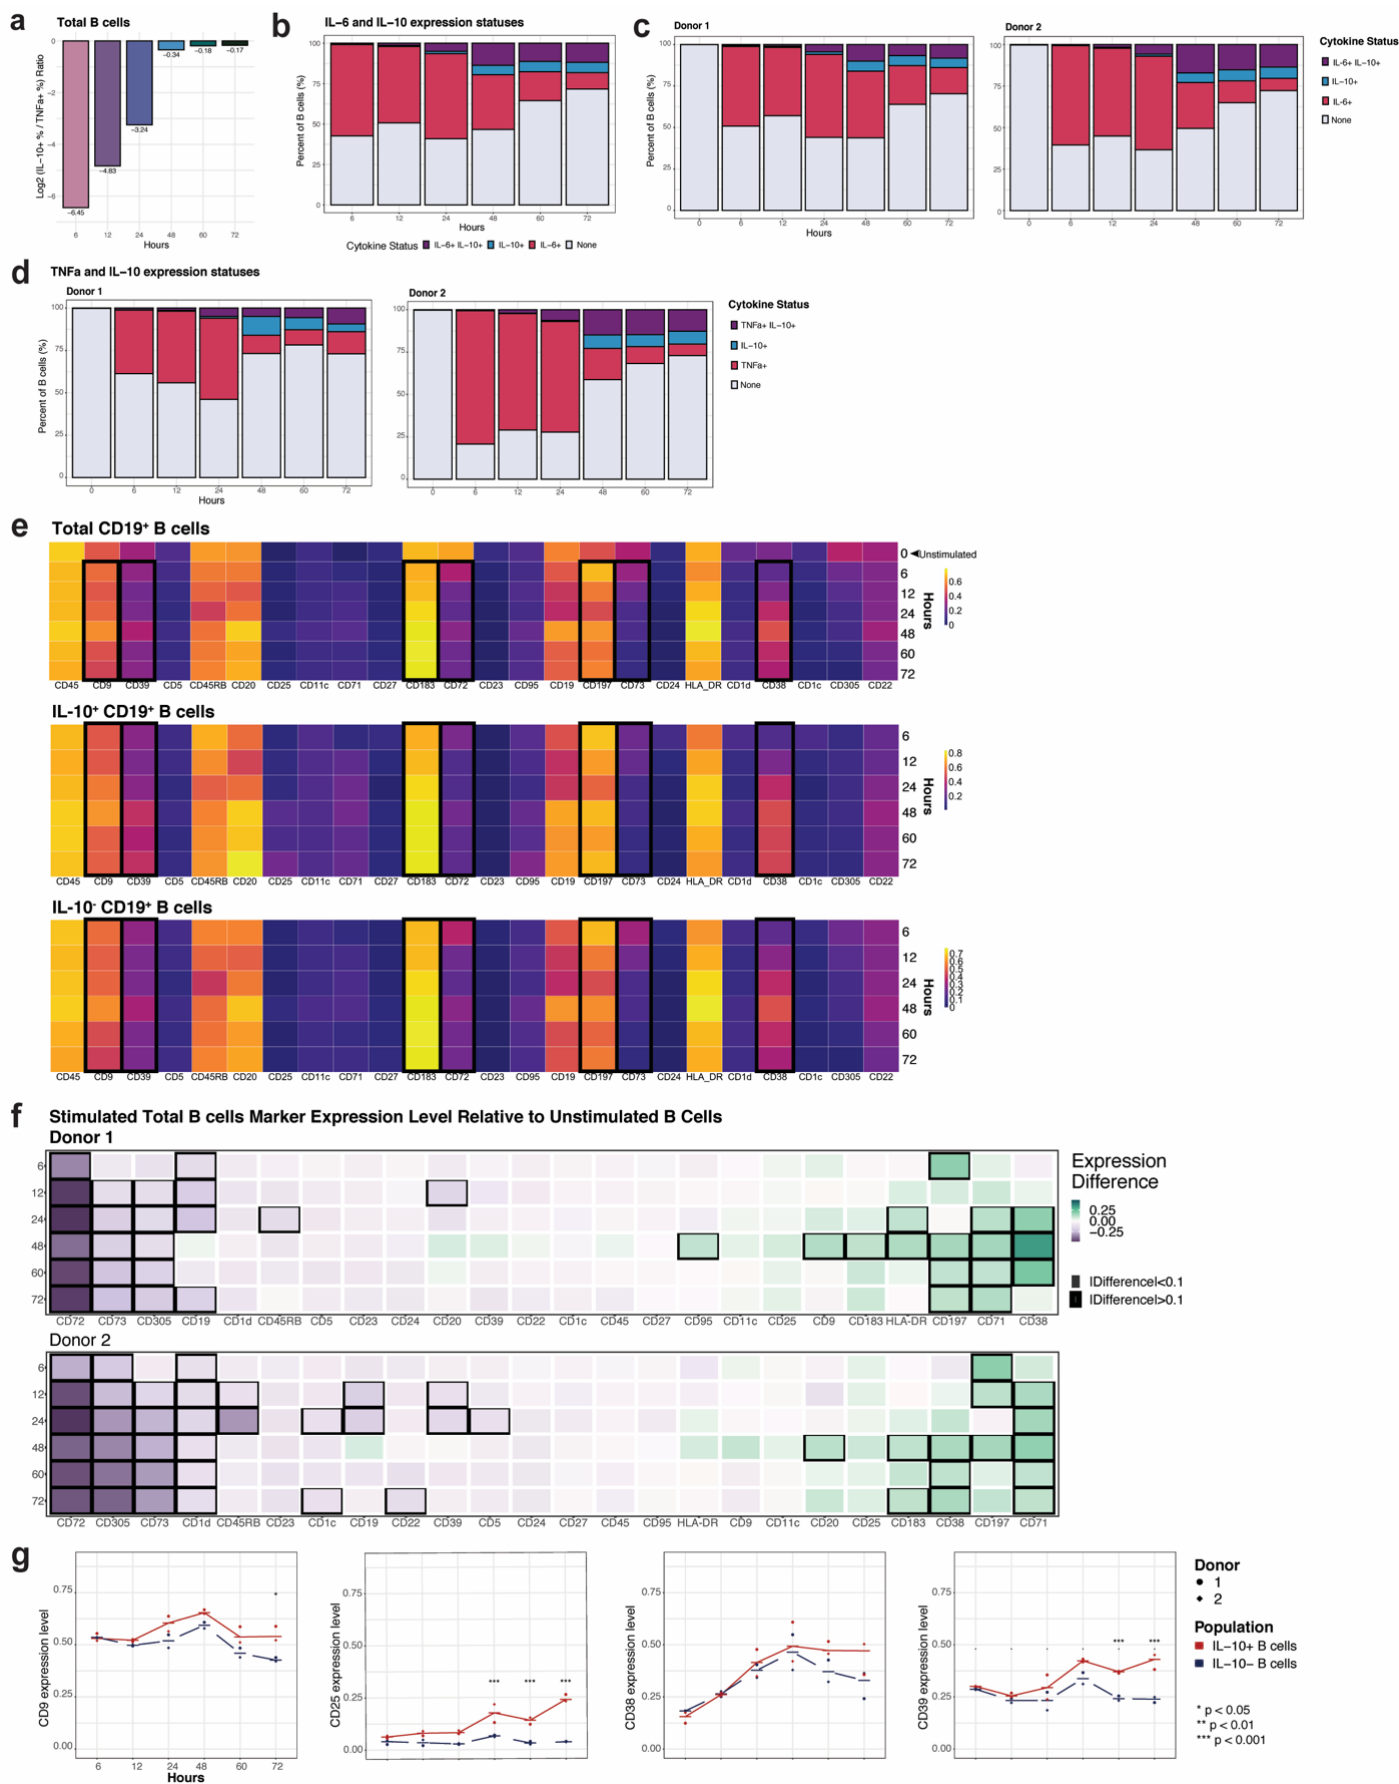

**Figure S2.** Surface marker and cytokine expression of unstimulated and stimulated total B cells and IL-10<sup>+</sup> B cells from stimulation timecourse. Related to Figure 2.

- (A) Log<sub>2</sub> ratio of percentage IL-10<sup>+</sup> over TNFα<sup>+</sup> donor-pooled, stimulated B cells by timepoint (hours).
- (B) Percentage of cells by IL-6 and IL-10 expression for stimulated donor-pooled B cells by timepoint (hours).
- (C) Percentage of cells by IL-6 and IL-10 expression for stimulated B cells by timepoint (hours; x axis) and individual donor (panels).
- (D) Percentage of cells by TNFα and IL-10 expression for stimulated B cells by timepoint (hours; x axis) and individual donor (panels).
- (E) Median expression heatmap of total, IL-10<sup>+</sup> and IL-10<sup>-</sup> B cells across timepoints of Breg-specific stimulation (6-72 hours).
- (F) Difference in median expression of surface markers in unstimulated versus stimulated B cells by timepoint (hours; rows) and by individual donors (heatmap panels). Boxes in heatmap indicate markers with an absolute value of difference greater than 0.1. Expression difference only shown for markers and cytokines with a p value less than 0.05 (light gray fill indicates p > 0.05). P values denote result of Kolmogorov-Smirnov test with Bonferroni multiple hypothesis correcting.
- (G) Median expression level of markers with diverging patterns between IL-10<sup>+</sup> and IL-10<sup>-</sup> B cells by timepoint (hours; x axis) and individual donors (dots). P values denote result of Kolmogorov-Smirnov test with Bonferroni multiple hypothesis correcting. \* p < 0.05. \*\*\* p < 0.001.

### Supplemental Figure 3

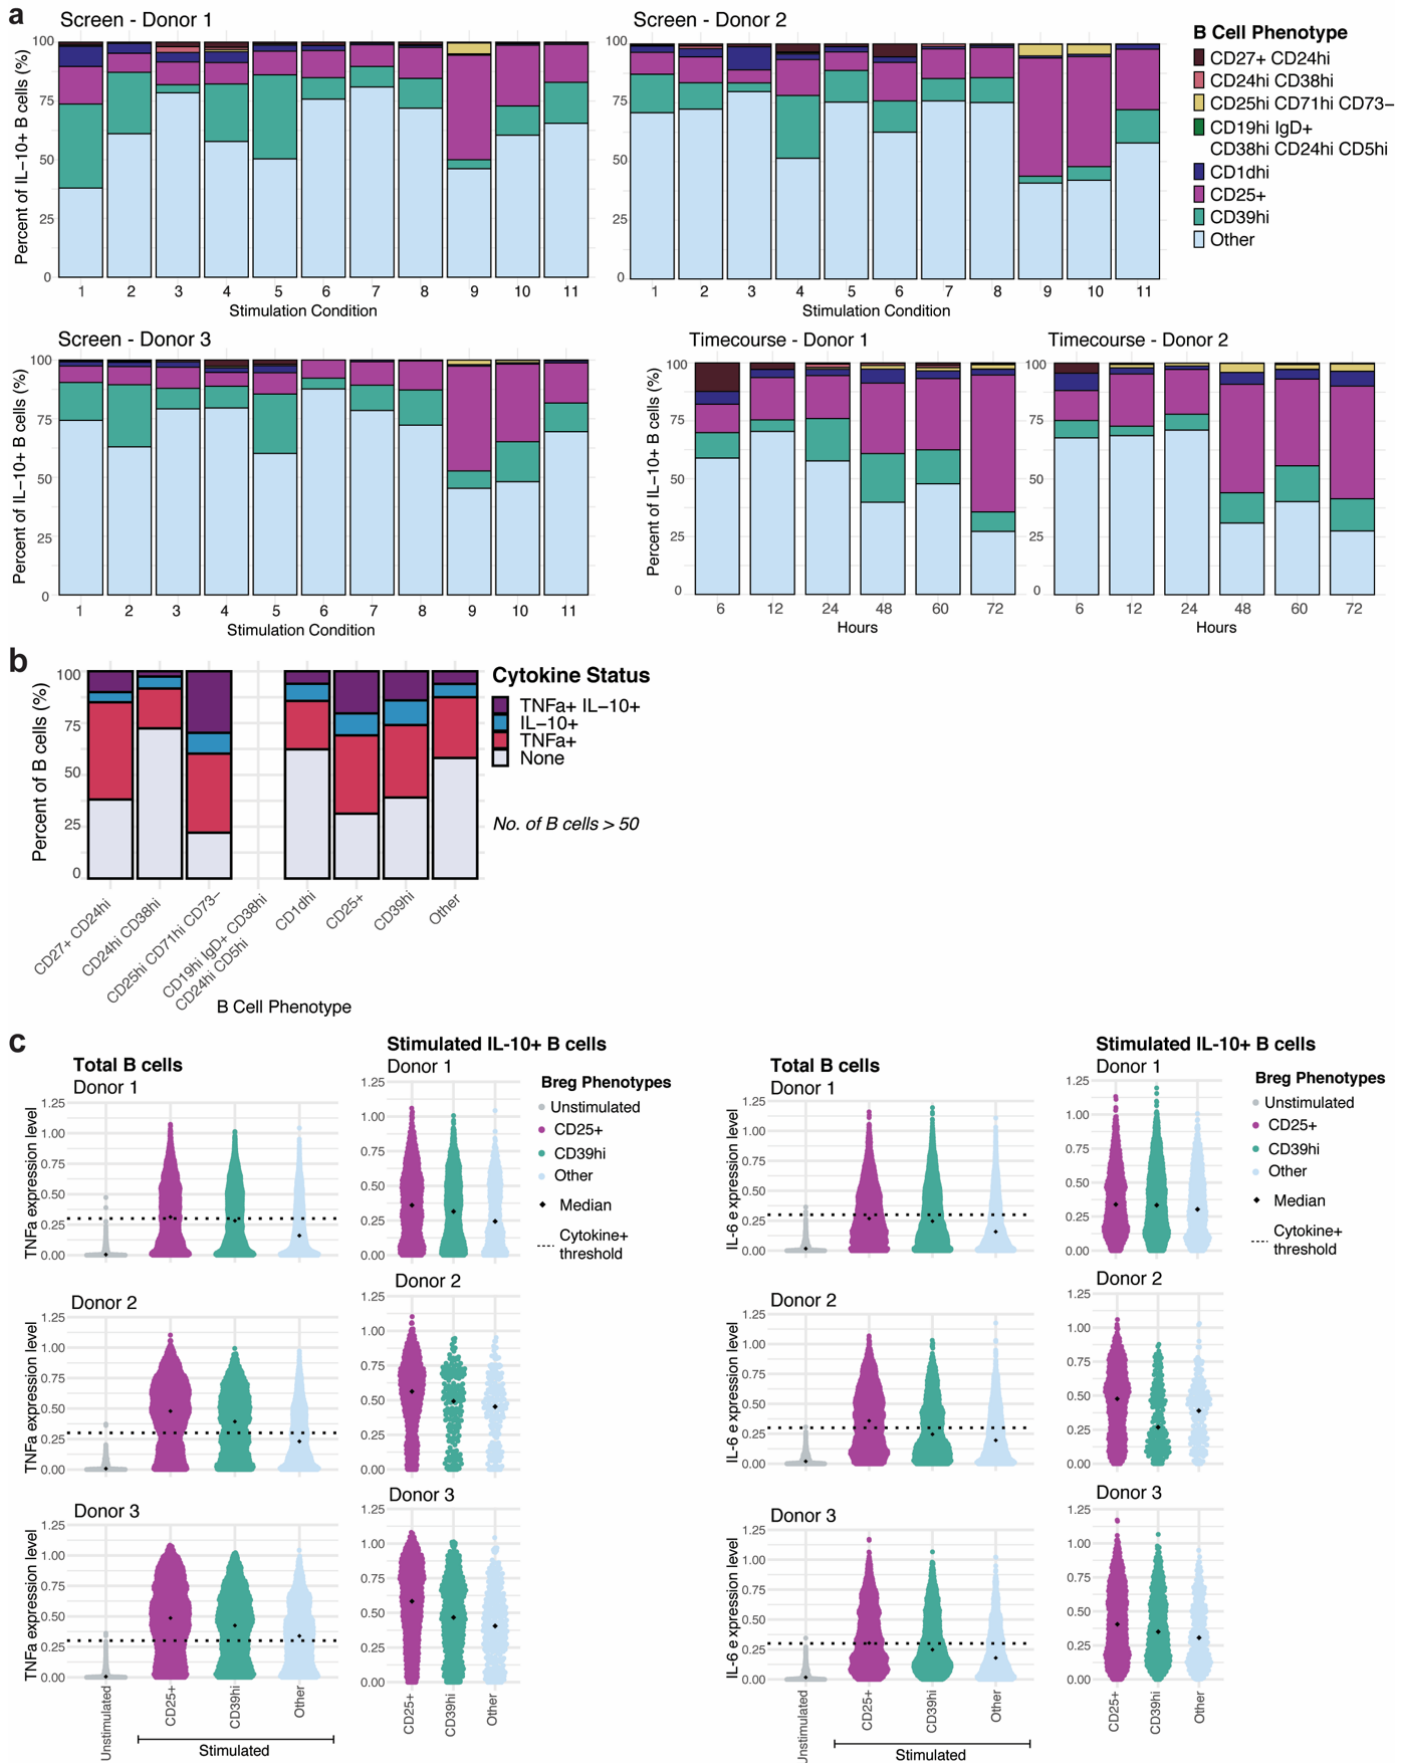

**Figure S3.** Cytokine expression of stimulated total and IL-10<sup>+</sup> B cells with conventional Breg immunophenotypes from stimulation screen and timecourse experiments. Related to Figure 3.

- (A) Percentage of B cell phenotypes among total IL-10<sup>+</sup> B cells by stimulatory condition (duration of 72 hours only; x axis) and individual donor (panels) from stimulation screen (first 3 panels) and by timepoint or hours (condition 10 only; x axis) and individual donor (panels) from stimulation timecourse (last 2 panels).
- (B) Percentage of cells by TNF $\alpha$  and IL-10 expression and B cell phenotype from pooled data of screen and timecourse experiments. Data for those B cell phenotypes represented by less than 50 total cells were excluded.
- (C) TNF $\alpha$  (left 6 panels) and IL-6 (right 6 panels) expression levels for total unstimulated B cells versus stimulated CD25<sup>+</sup>, CD39<sup>hi</sup> and other phenotype B cells (left columns) and for stimulated IL-10<sup>+</sup> CD25<sup>+</sup>, IL-10<sup>+</sup> CD39<sup>hi</sup> and IL-10<sup>+</sup> other phenotype B cells (right columns) for each individual donor (rows). Diamond indicates median; dashed line indicates threshold for cytokine positivity based on unstimulated B cell expression.

# Supplemental Figure 4

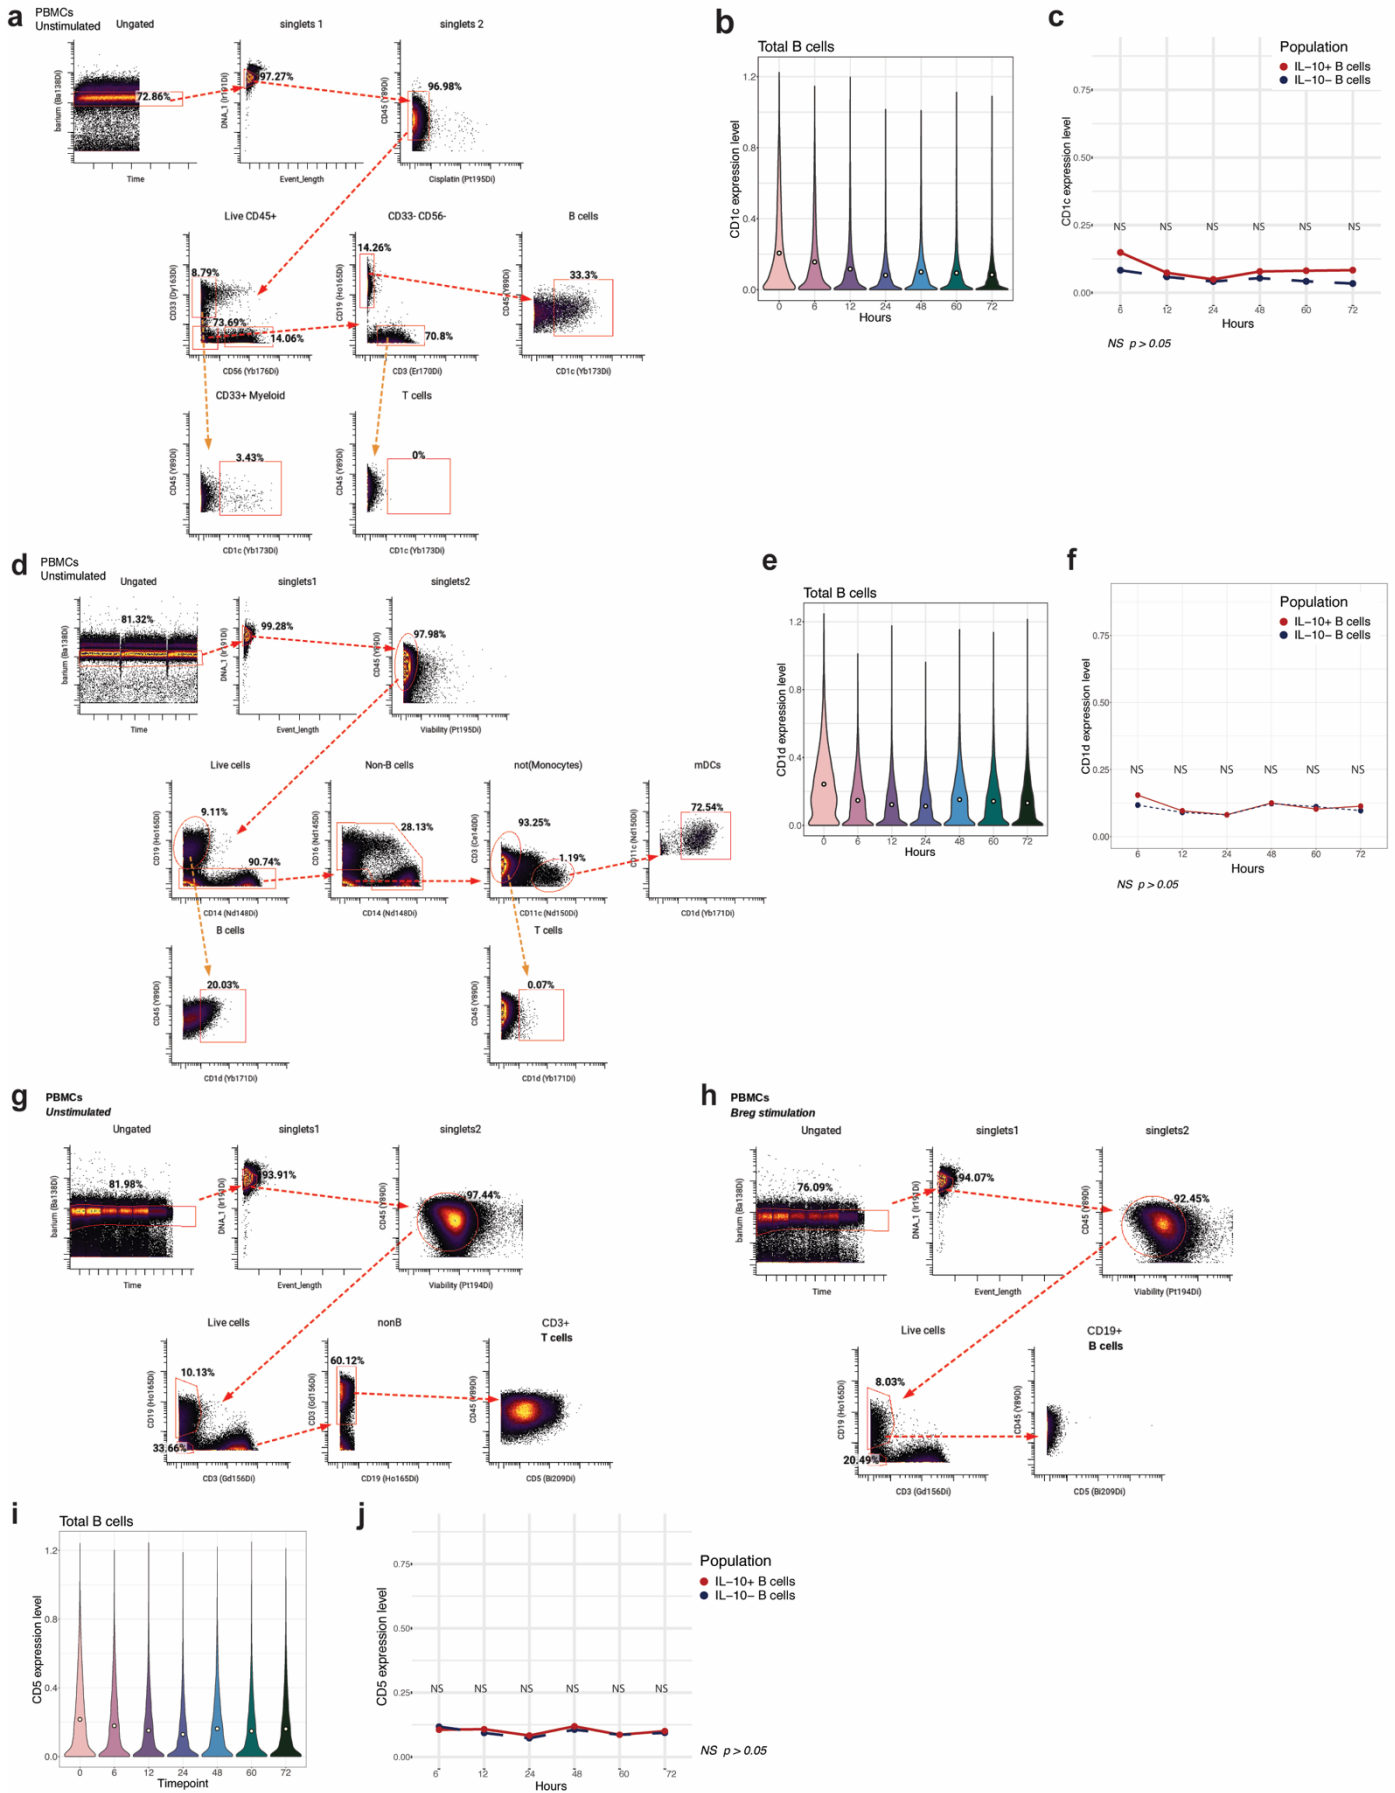



**Figure S4.** Mass cytometry analysis of CD1c, CD1d and CD5 expression in unstimulated immune cells and stimulated B cells of healthy individuals. Related to Figure 2 and STAR Methods.

- (A) Representative gating strategy for total unstimulated peripheral B cells, T cells and CD33<sup>+</sup> myeloid cells within mass cytometry analysis of total PBMCs, with exemplary biaxial plots of CD1c expression in each gated cell population.
- (B) Median CD1c expression levels in total B cells by timepoint (hours) in the timecourse experiment. Unstimulated B cell data is depicted as timepoint 0 (hours).
- (C) Median CD1c expression levels in stimulated IL-10<sup>+</sup> B cells (red) versus IL-10<sup>-</sup> B cells (blue) by timepoint (hours) in the timecourse experiment.
- (D) Representative gating strategy for total unstimulated peripheral B cells, T cells and dendritic cells (DCs) within mass cytometry analysis of total PBMCs, with exemplary biaxial plots of CD1d expression in each gated cell population.
- (E) Median CD1d expression levels in total B cells by timepoint (hours) in the timecourse experiment. Unstimulated B cell data is depicted as timepoint 0 (hours).
- (F) Median CD1d expression levels in stimulated IL-10<sup>+</sup> B cells (red) versus IL-10<sup>-</sup> B cells (blue) by timepoint (hours) in the timecourse experiment.
- (G) Representative gating strategy for total unstimulated T cells within mass cytometry analysis of total PBMCs, with final biaxial plot showing positive CD5 antibody staining of T cells.
- (H) Representative gating strategy for total Breg-stimulated B cells within mass cytometry analysis of total PBMCs, with final biaxial plot indicating minimal CD5 antibody staining of B cells.
- (I) Median CD5 expression levels in total B cells by timepoint (hours) in the timecourse experiment. Unstimulated B cell data is depicted as timepoint 0 (hours).
- (J) Median CD5 expression levels in stimulated IL-10<sup>+</sup> B cells (red) versus IL-10<sup>-</sup> B cells (blue) by timepoint (hours) in the timecourse experiment.

# Supplemental Figure 5

**a** PBMCs

*T cell stimulation*

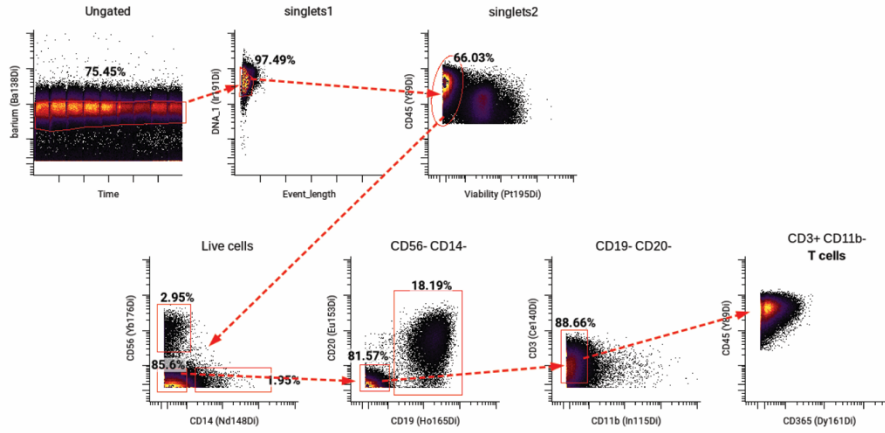

**b** PBMCs

*Breg stimulation*

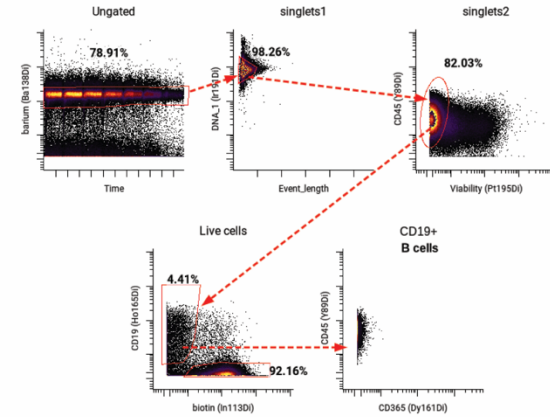

**c** CD4+ T cells

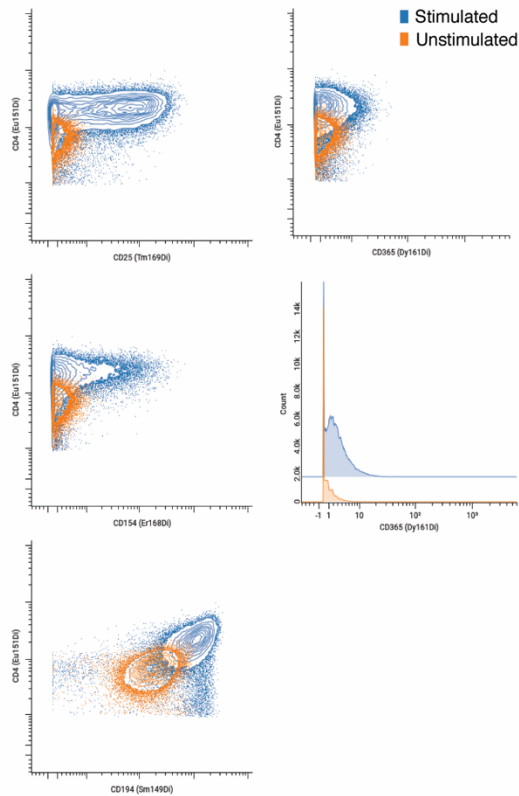

**d** Total B cells

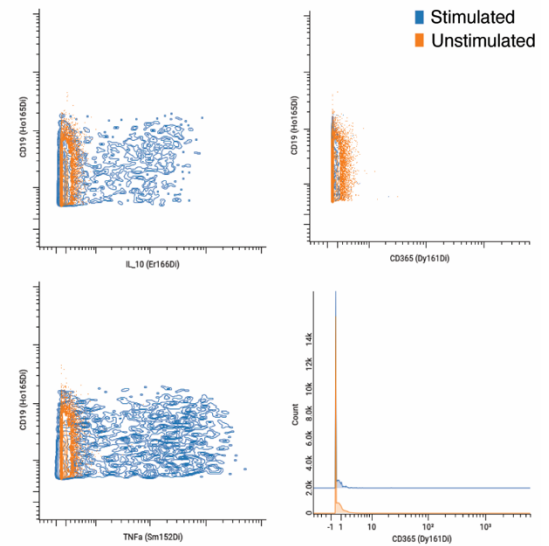

**Figure S5.** Mass cytometry analysis of CD365/TIM-1 expression in unstimulated and stimulated T and B cells of healthy individuals. Related to STAR Methods.

- (A) Representative gating strategy for anti-CD3/anti-CD28-stimulated peripheral T cells within mass cytometry analysis of total PBMCs, with exemplary biaxial plot of CD365/TIM-1 expression in T cells.
- (B) Representative gating strategy for Breg-stimulated peripheral B cells within mass cytometry analysis of total PBMCs, with exemplary biaxial plot of CD365/TIM-1 expression in B cells.
- (C) Exemplarily biaxial plots depicting upregulation of activation molecules, CD25, CD154/CD40L and CD194/CCR4, and CD365/TIM-1 expression level in anti-CD3/anti-CD28-stimulated (blue) total peripheral CD4<sup>+</sup> T cells as compared to unstimulated (orange) cells from the same healthy individuals.
- (D) Exemplarily biaxial plots depicting upregulation of the IL-10 and TNF $\alpha$  cytokines, and no change in CD365/TIM-1 expression level in Breg-stimulated (blue) total B cells as compared to unstimulated (orange) cells from the same healthy individuals.

# Supplemental Figure 6

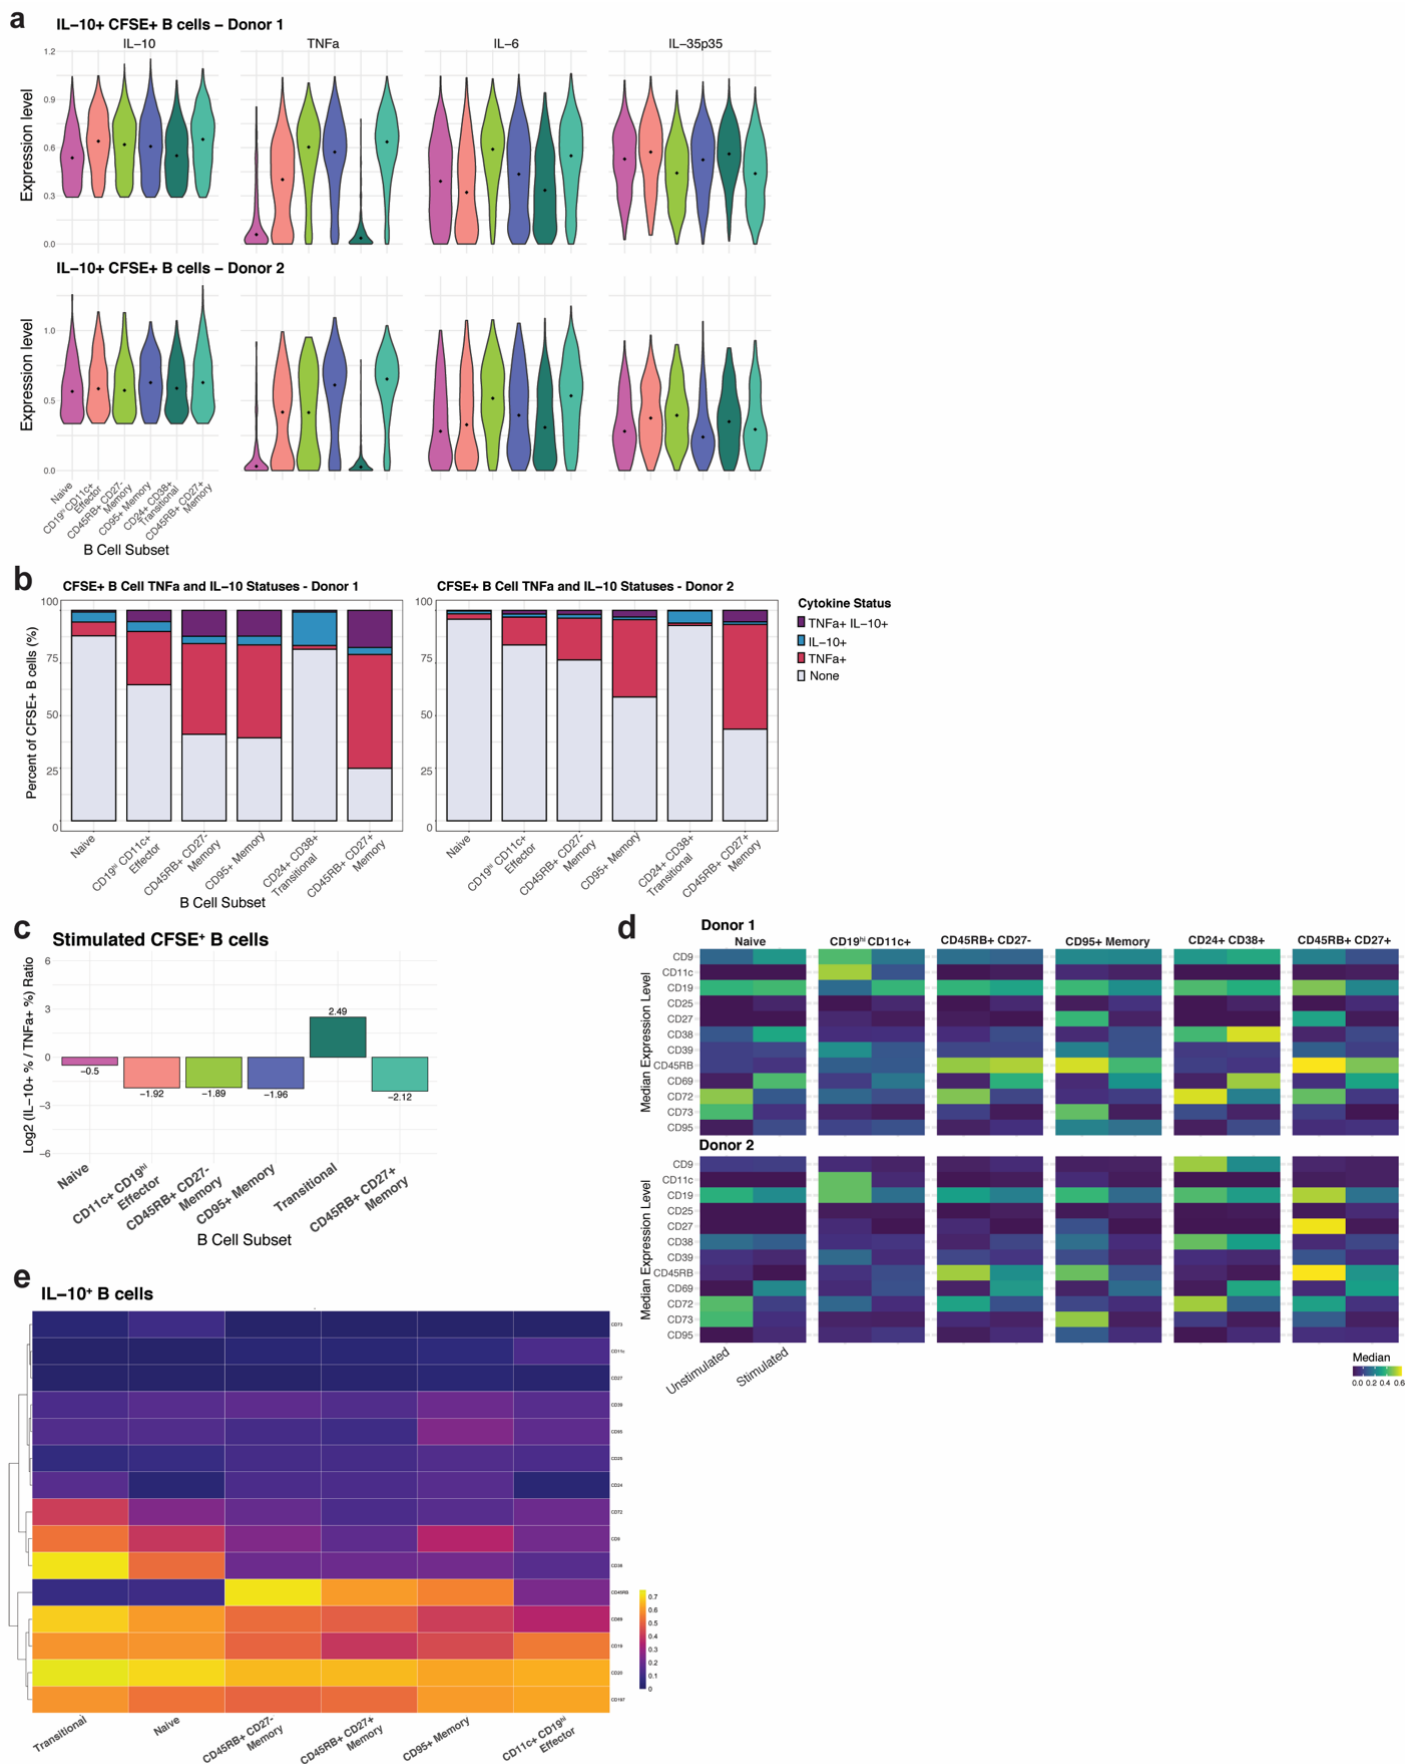

**Figure S6.** Surface marker and cytokine expression of stimulated total and IL-10<sup>+</sup> cells from B cell subsets within B cell sorting experiment. Related to Figure 4.

- (A) Expression levels of indicated cytokines by each of CFSE<sup>+</sup> IL-10<sup>+</sup> B cell subsets for individual donors (rows of 4 plots). Diamond indicates median expression.
- (B) Percentage of B cells by TNF $\alpha$  and IL-10 expression for stimulated CFSE<sup>+</sup> B cell subsets (x axis) of individual donors (panels).
- (C) Log2 ratio of percentage IL-10<sup>+</sup>:TNF $\alpha$ <sup>+</sup> donor-pooled stimulated B cells by sorted B cell subset.
- (D) Median expression level of surface markers with differential expression in unstimulated versus stimulated B cells in each of the six B cell subsets (columns) of individual donors (top and bottom panels).
- (E) Surface marker expression heatmap of IL-10<sup>+</sup> CFSE<sup>+</sup> B cell subsets.

# Supplemental Figure 7

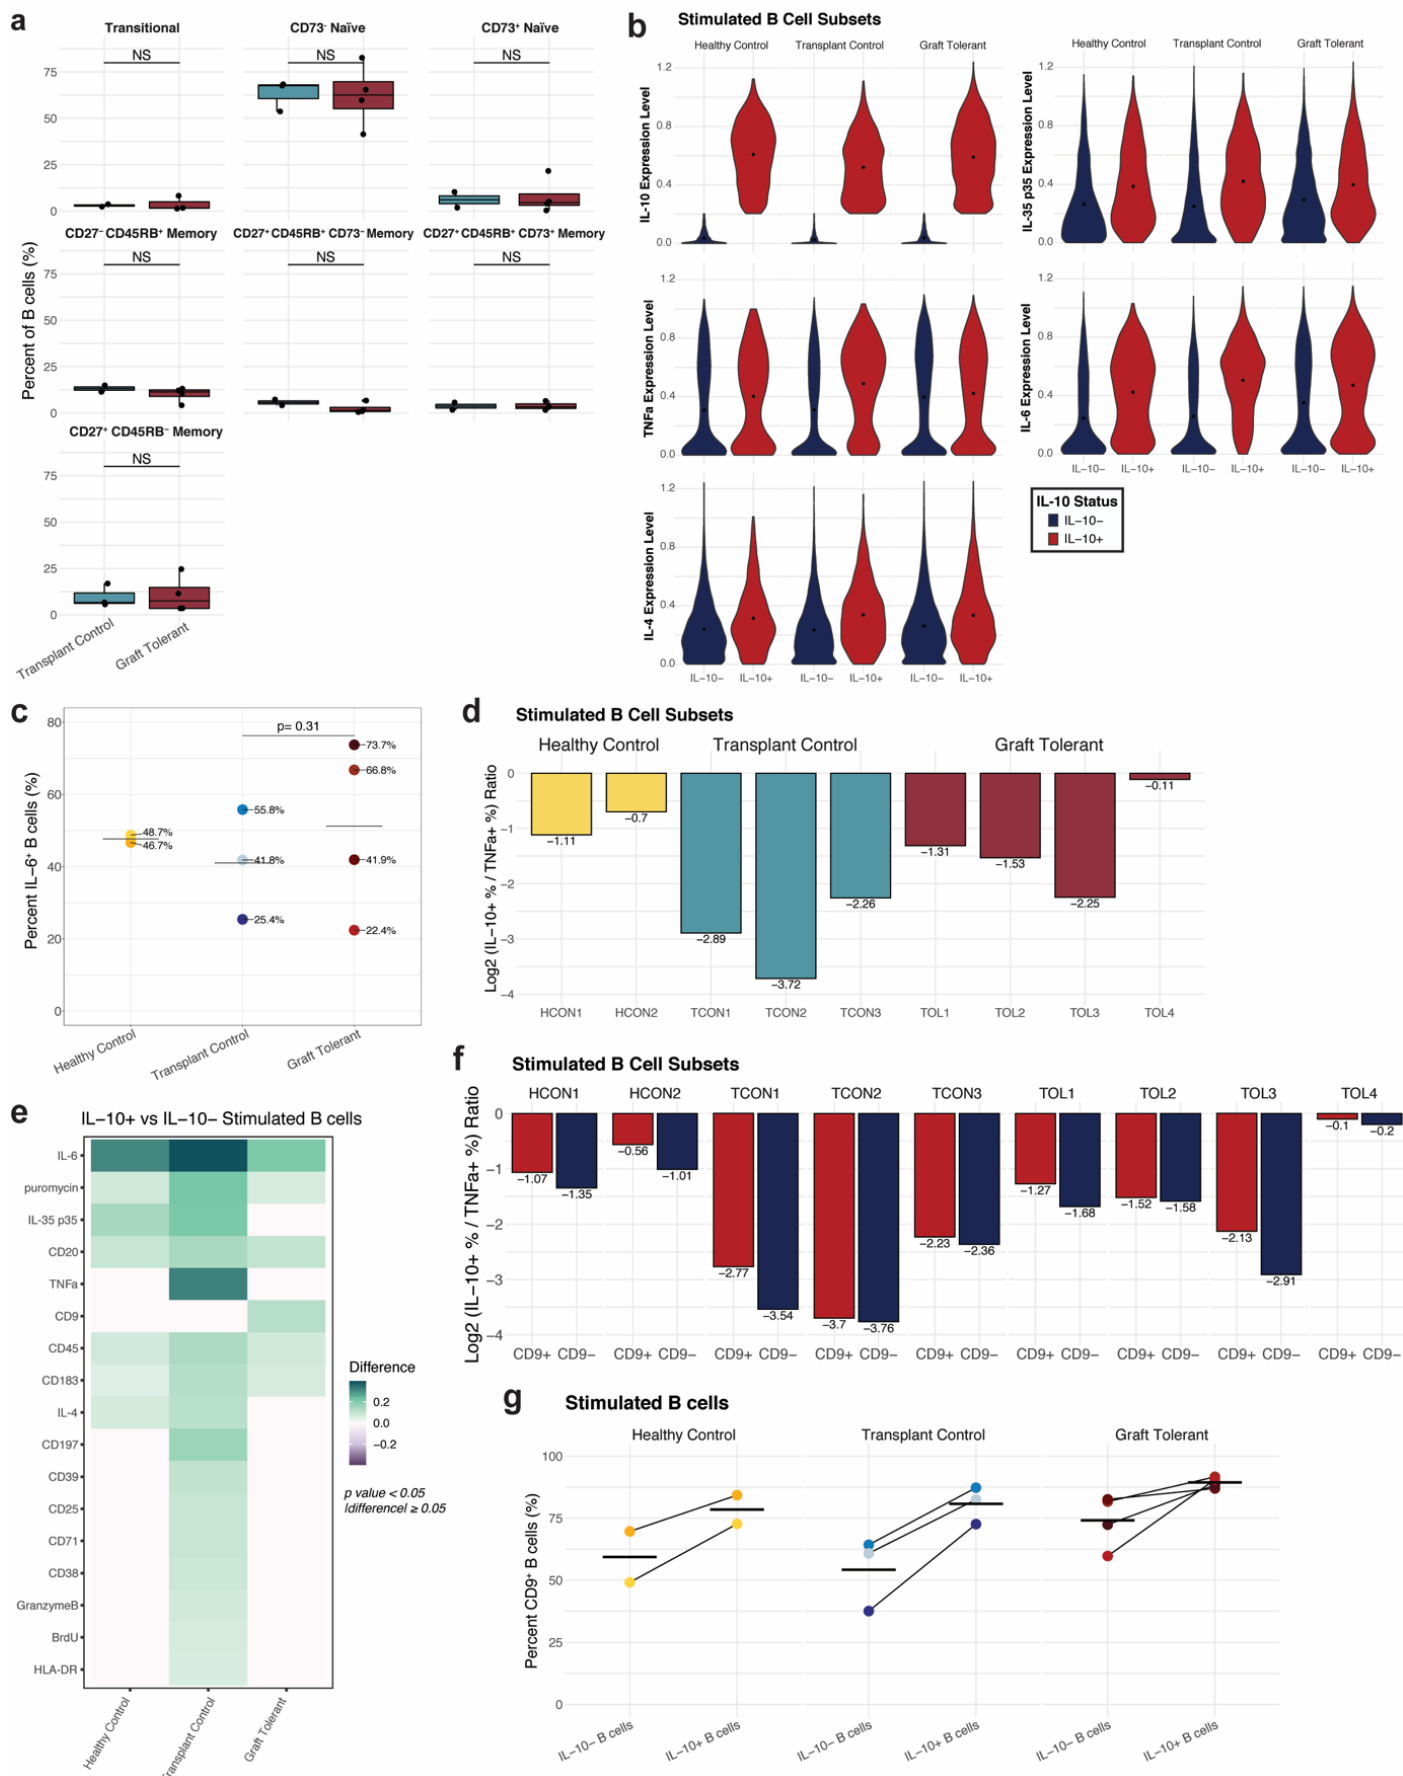

**Figure S7.** B cell subset proportions and surface marker and cytokine expression of stimulated B cells in clinical cohort analysis. Related to Figure 5.

- (A) Percentage of B cell subsets among total unstimulated B cells by clinical group (x axis) and individual donors (dots). Data shown only for cell subsets representing >2% of total B cells. Line depicts median, box depicts interquartile range (IQR), and whiskers depict  $IQR + 1.5 * IQR$ . P value denotes result of Wilcoxon signed-rank test. NS  $p > 0.05$
- (B) Cytokine expression levels of IL-10<sup>+</sup> and IL-10<sup>-</sup> stimulated B cells in organ transplant recipient clinical cohorts and healthy control group.
- (C) Percent of IL-6<sup>+</sup> B cells by group and individuals in clinical cohort analysis.
- (D) Log<sub>2</sub> ratio of percentage IL-10<sup>+</sup> to TNF $\alpha$ <sup>+</sup> B cells by group and individual donor.
- (E) Relative difference in median expression of surface markers and cytokines in IL-10<sup>+</sup> versus IL-10<sup>-</sup> stimulated B cells by clinical cohort. Expression only shown for markers and cytokines with difference greater than or equal to 0.05 and a P value less than 0.05. P values denote result of Kolmogorov-Smirnov test with Bonferroni multiple hypothesis correcting.
- (F) Log<sub>2</sub> ratio of percentage IL-10<sup>+</sup> to TNF $\alpha$ <sup>+</sup> cells for CD9<sup>+</sup> (red) and CD9<sup>-</sup> (blue) B cells by group and individual donor.
- (G) Percent of CD9<sup>+</sup> cells among IL-10<sup>-</sup> and IL-10<sup>+</sup> stimulated B cells by group and individuals in clinical cohort analysis.

# Supplemental Figure 8

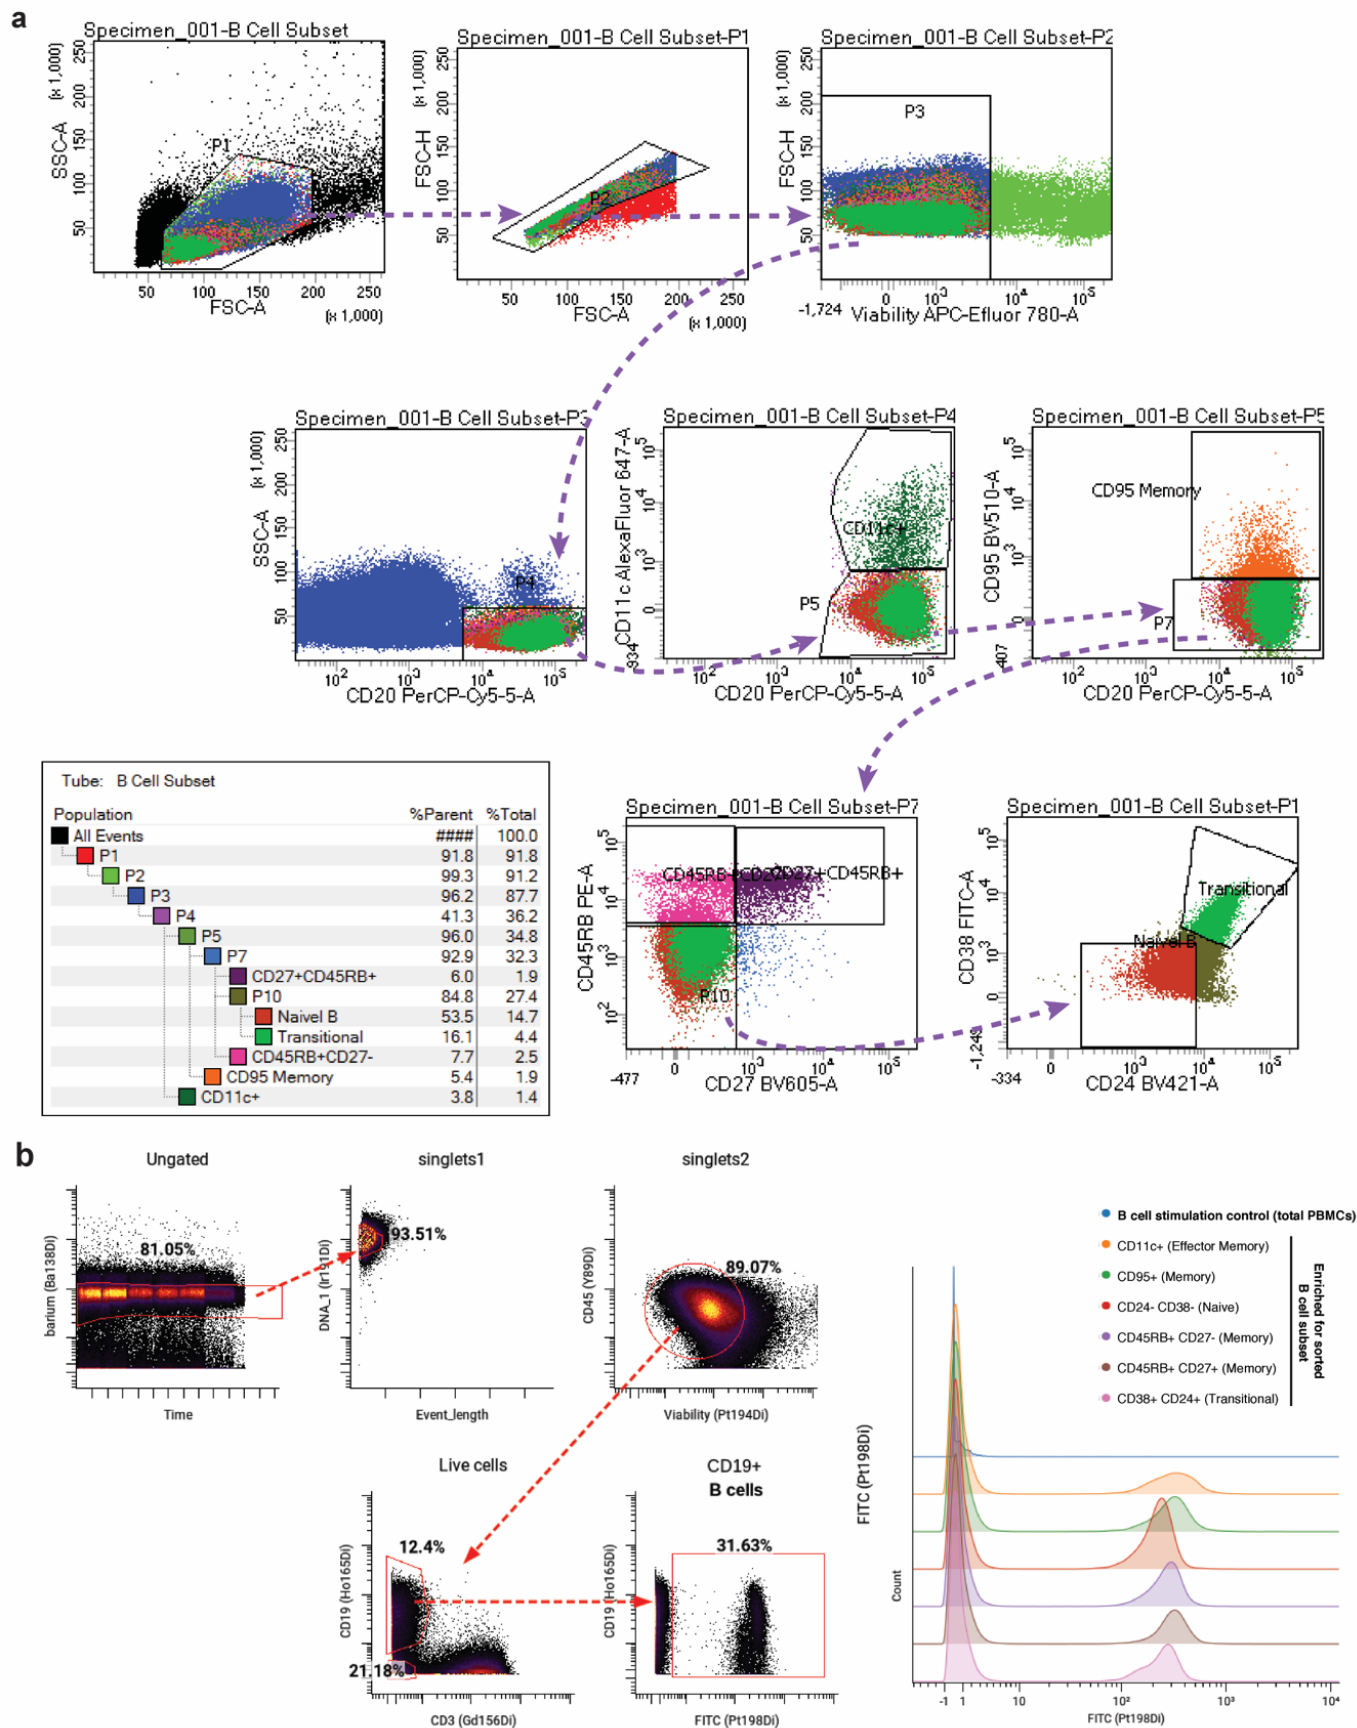



**Figure S8.** Representative gating strategies and CFSE labeling of B cell subsets within sorting experiments. Related to Figure 4 and STAR Methods.

- (A) Sorting strategy to isolate CD24<sup>-</sup> CD38<sup>-</sup> naïve, CD24<sup>+</sup> CD38<sup>+</sup> transitional, CD45RB<sup>+</sup> CD27<sup>+</sup> memory, CD45RB<sup>+</sup> CD27<sup>-</sup> memory, CD95<sup>+</sup> memory, and CD11<sup>+</sup> effector memory subsets from live CD20<sup>+</sup> human peripheral blood B cells for CFSE labeling and *in vitro* Breg stimulation with total PBMCs.
- (B) Representative gating strategy for total B cells within mass cytometry analysis of B cell subset sorting experiment (left panel). Distinct antibody staining of CFSE<sup>+</sup> B cells is indicated in the last biaxial plot of the gating strategy, representing the sorted and CFSE-labeled transitional B cell subset, and in the overlapping histograms representing all sorted and labeled B cell subsets (right panel).

Supplemental Figure 9

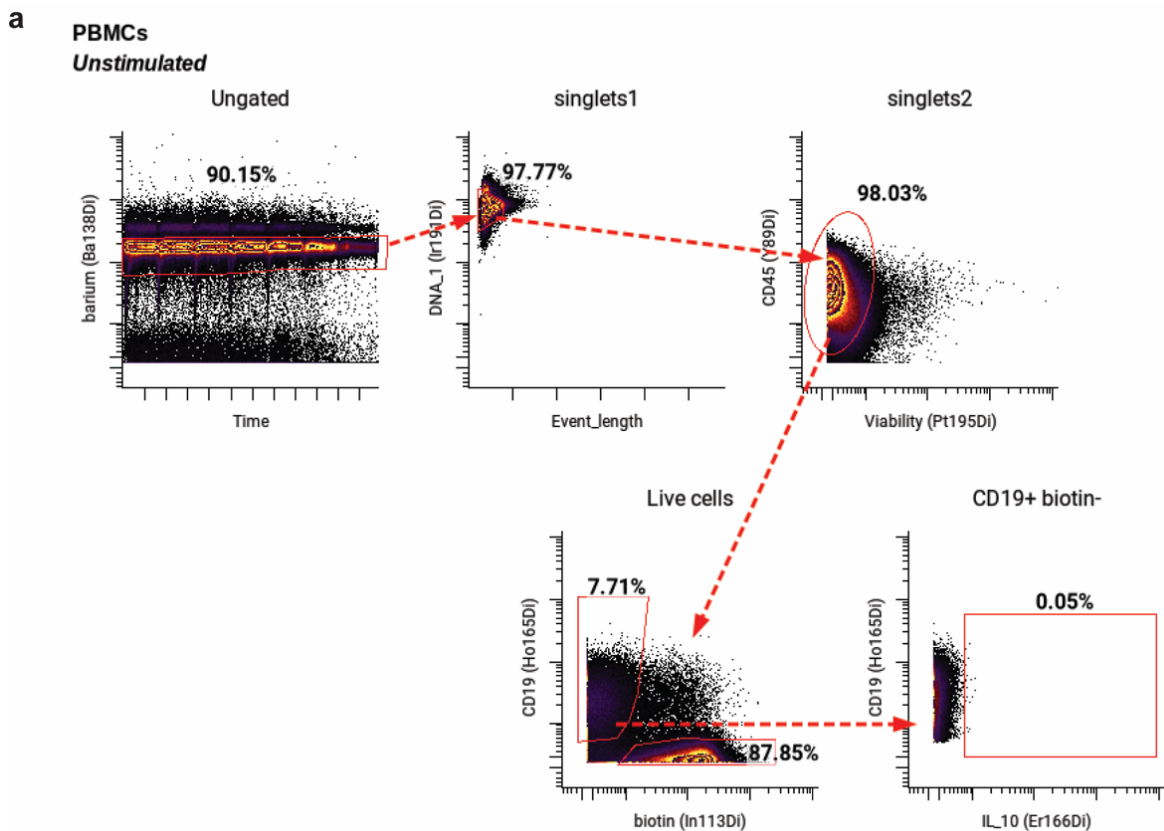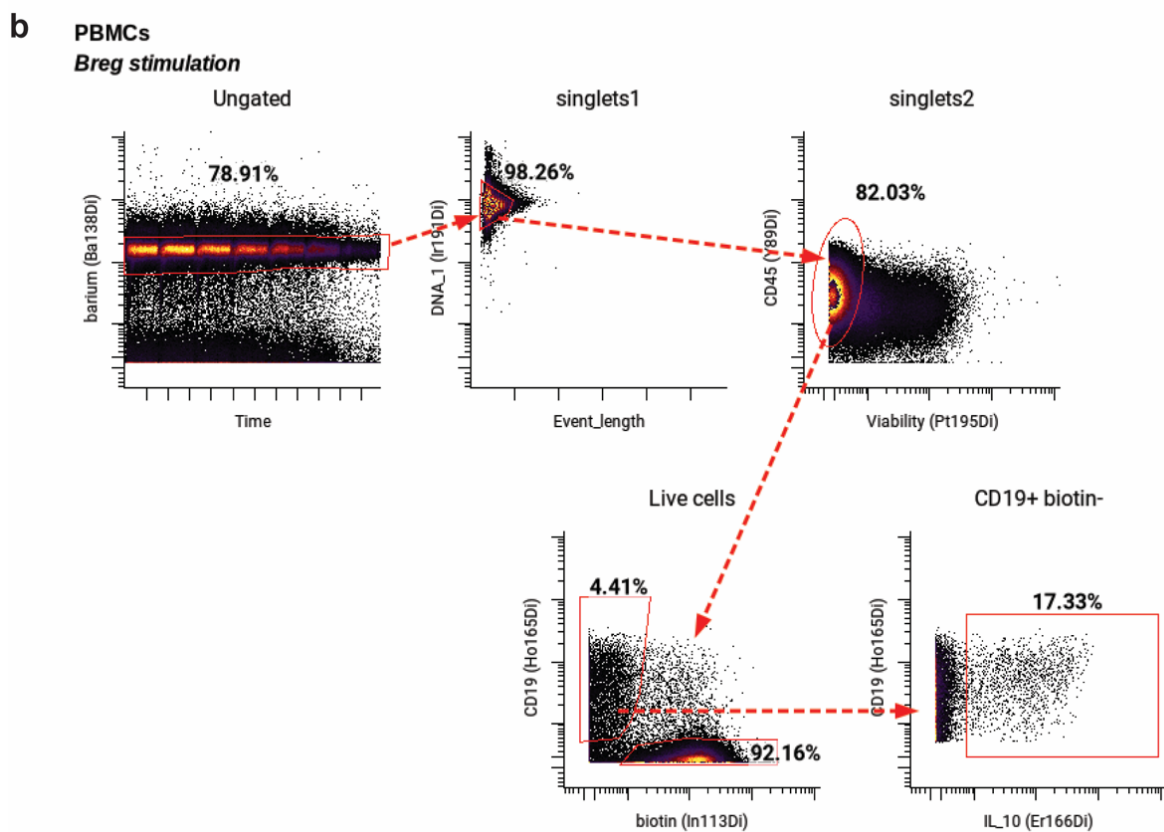

**Figure S9.** Representative gating strategy for unstimulated and stimulated B cells in mass cytometry analysis. Related to STAR Methods.

- (A) Representative gating strategy for total unstimulated peripheral B cells within mass cytometry analysis of total PBMCs, with exemplary biaxial plot indicating absence of IL-10 expression.
- (B) Representative gating strategy for total stimulated peripheral B cells within mass cytometry analysis of total PBMCs, with exemplary biaxial plot of high IL-10 expression.

## Supplementary Table 1

| Clinical group               | n | Transplanted Organ(s) | IS at time of sampling? | Rejection episode before or at sampling? | IS             | Interval wo IS before sampling range / mean (years) | Interval wo IS after sampling range / mean (years) | Sex ratio (M:F) | Age range (years) | Age mean (years) |
|------------------------------|---|-----------------------|-------------------------|------------------------------------------|----------------|-----------------------------------------------------|----------------------------------------------------|-----------------|-------------------|------------------|
| Operational graft tolerance  | 4 | Liver                 | No                      | No                                       | ---            | 0.25 - 13 / 7.1*                                    | 0.42 - 5 / 2.8*                                    | 1:1             | 0.42 - 21         | 13.6             |
| Transplant recipient control | 3 | Liver                 | Yes                     | No                                       | <i>Prograf</i> | ---                                                 | ---                                                | 1:2             | 7 - 19            | 14.8             |
| Healthy control              | 2 | None                  | No                      | ---                                      | ---            | ---                                                 | ---                                                | 1:1             | 19 - 32           | 25.5             |

\* *Data not available for one patient*

**Table S1.** Clinical characteristics of transplant patients and healthy controls. Related to Figure 5 and STAR Methods.

Abbreviations: *IS*, *Immunosuppression*

Supplementary Table 2

| Donor | Status             | Condition    | Proportion live CD45+ cells among singlets (%) | Proportion B cells among live CD45+ cells (%) | Proportion IL-10+ B cells among total B cells (%) |
|-------|--------------------|--------------|------------------------------------------------|-----------------------------------------------|---------------------------------------------------|
| HCON1 | Healthy Control    | Unstimulated | 98.03                                          | 8.05                                          | NA                                                |
| HCON1 | Healthy Control    | Stimulated   | 72.05                                          | 1.33                                          | 25.42                                             |
| HCON2 | Healthy Control    | Unstimulated | 98.61                                          | 7.62                                          | NA                                                |
| HCON2 | Healthy Control    | Stimulated   | 81.82                                          | 1.37                                          | 28.89                                             |
| TCON1 | Transplant Control | Unstimulated | 97.40                                          | 7.97                                          | NA                                                |
| TCON1 | Transplant Control | Stimulated   | 84.32                                          | 4.41                                          | 8.09                                              |
| TCON2 | Transplant Control | Unstimulated | 39.41                                          | 1.38                                          | NA                                                |
| TCON2 | Transplant Control | Stimulated   | 66.76                                          | 2.88                                          | 2.57                                              |
| TCON3 | Transplant Control | Unstimulated | 86.44                                          | 7.15                                          | NA                                                |
| TCON3 | Transplant Control | Stimulated   | 90.65                                          | 2.02                                          | 9.31                                              |
| TOL1  | Graft Tolerant     | Unstimulated | 79.91                                          | 17.28                                         | NA                                                |
| TOL1  | Graft Tolerant     | Stimulated   | 70.63                                          | 12.23                                         | 23.70                                             |
| TOL2  | Graft Tolerant     | Unstimulated | 67.29                                          | 5.50                                          | NA                                                |
| TOL2  | Graft Tolerant     | Stimulated   | 57.81                                          | 3.14                                          | 24.43                                             |
| TOL3  | Graft Tolerant     | Unstimulated | 67.22                                          | 6.84                                          | NA                                                |
| TOL3  | Graft Tolerant     | Stimulated   | 82.03                                          | 4.64                                          | 16.74                                             |
| TOL4  | Graft Tolerant     | Unstimulated | 95.20                                          | 7.69                                          | NA                                                |
| TOL4  | Graft Tolerant     | Stimulated   | 36.76                                          | 8.69                                          | 28.03                                             |

**Table S2.** Frequency of live cells and total and IL-10<sup>+</sup> B cells in clinical groups and healthy control individuals. Related to Figure 5 and STAR Methods.

**Supplementary Table 3**

| Experiment                                                                                                                                       | Condition   | Reagent                                                 | Final concentration | Vendor      | Catalogue number |
|--------------------------------------------------------------------------------------------------------------------------------------------------|-------------|---------------------------------------------------------|---------------------|-------------|------------------|
| Cytokine and phenotypic screen of B cell stimulations (Fig 1 and 3)                                                                              | 1 - 3       | R848                                                    | 1 ug/mL             | Mabtech     | 3660-1           |
|                                                                                                                                                  | 4 - 6       | Lipopolysaccharides (LPS) from Escherichia coli O127:B8 | 10 ug/mL            | Sigma       | L4516-1MG        |
|                                                                                                                                                  | 7 - 11      | CpG ODN 2006                                            | 10 ug/mL            | Invivogen   | tlrl-2006        |
|                                                                                                                                                  |             | Soluble human anti-CD40 clone 82111                     | 500 ng/mL           | RD Systems  | MAB6321-100      |
|                                                                                                                                                  | 3, 6        | Recombinant human IL-4                                  | 20 ng/mL            | RD Systems  | 204-IL-020       |
|                                                                                                                                                  | 3, 6, 9, 11 | Recombinant human IL-10                                 | 25 ng/mL            | Biologend   | 571002           |
|                                                                                                                                                  | 9 - 11      | Recombinant human IL-2                                  | 600 IU/mL           | Mabtech     | 3660-1           |
|                                                                                                                                                  | 9 - 10      | Recombinant human IL-21                                 | 100 ng/mL           | RD Systems  | 8879-IL-010      |
|                                                                                                                                                  | 10 - 11     | Recombinant human IL-35                                 | 20 ng/mL            | Enzo Life   | ALX-522-140-C010 |
|                                                                                                                                                  | All         | Phorbol 12-myristate 13-acetate                         | 50 ng/mL            | Sigma       | P8139-1MG        |
|                                                                                                                                                  | All         | Ionomycin calcium salt from Streptomyces conglobatus    | 1 ug/mL             | Sigma       | I0634-1MG        |
|                                                                                                                                                  | All         | Brefeldin A Solution                                    | 1x                  | eBioscience | 00-4506-51       |
| Timecourse of Breg stimulation (Fig 2-3), B cell subset sorting and stimulation (Fig 4), and clinical cohort and control B cell analysis (Fig 5) | All         | CpG ODN 2006                                            | 10 ug/mL            | Invivogen   | tlrl-2006        |
|                                                                                                                                                  | All         | Soluble human anti-CD40 clone 82111                     | 500 ng/mL           | RD Systems  | MAB6321-100      |
|                                                                                                                                                  | All         | Recombinant human IL-2                                  | 600 IU/mL           | Mabtech     | 3660-1           |
|                                                                                                                                                  | All         | Recombinant human IL-21                                 | 100 ng/mL           | RD Systems  | 8879-IL-010      |
|                                                                                                                                                  | All         | Recombinant human IL-35                                 | 20 ng/mL            | Enzo Life   | ALX-522-140-C010 |
|                                                                                                                                                  | All         | Phorbol 12-myristate 13-acetate                         | 50 ng/mL            | Sigma       | P8139-1MG        |
|                                                                                                                                                  | All         | Ionomycin calcium salt from Streptomyces conglobatus    | 1 ug/mL             | Sigma       | I0634-1MG        |
|                                                                                                                                                  | All         | Brefeldin A Solution                                    | 1x                  | eBioscience | 00-4506-51       |
| T cell stimulation to validate antibody staining (Fig S5)                                                                                        | All         | Plate-bound human anti-CD3                              | 10 ug/mL            | Biologend   | 302933           |
|                                                                                                                                                  | All         | Plate-bound human anti-CD28                             | 5 ug/mL             | Biologend   | 317325           |
|                                                                                                                                                  | All         | Recombinant human IL-4                                  | 12.5 ng/mL          | RD Systems  | 204-IL-020       |
|                                                                                                                                                  | All         | Recombinant human IL-2                                  | 50 IU/mL            | Biologend   | 589102           |
|                                                                                                                                                  | All         | Brefeldin A Solution                                    | 1x                  | eBioscience | 00-4506-51       |

**Table S3.** Reagents for PBMC *in vitro* stimulations. Related to STAR Methods.

Supplementary Table 4

| Experiment                                                                                                                                      | Antigen         | Clone      | Tag             | Vendor          |
|-------------------------------------------------------------------------------------------------------------------------------------------------|-----------------|------------|-----------------|-----------------|
| <b>Panel 1:</b> Mass cytometry analysis of healthy human peripheral B cells (Fig 1-3) and organ transplant recipient peripheral B cells (Fig 5) | CD45            | HI30       | 89 Y            | Biolegend       |
|                                                                                                                                                 | CD9             | HI9a       | 141 Pr          | Biolegend       |
|                                                                                                                                                 | CD39/ENTPD1     | A1         | 142 Nd          | Biolegend       |
|                                                                                                                                                 | CD5             | UCHT2      | 143 Nd          | Biolegend       |
|                                                                                                                                                 | CD45RB          | MEM-55     | 145 Nd          | Fluidigm        |
|                                                                                                                                                 | CD20            | 2H7        | 147 Sm          | Fluidigm        |
|                                                                                                                                                 | CD25            | BC96       | 149 Sm          | Biolegend       |
|                                                                                                                                                 | CD11c           | Bu15       | 150 Nd          | Biolegend       |
|                                                                                                                                                 | CD71            | CY1G4      | 151 Eu          | Biolegend       |
|                                                                                                                                                 | IgK             | A8B5       | 153 Eu          | Invitrogen      |
|                                                                                                                                                 | CD27            | M-T271     | 155 Gd          | Biolegend       |
|                                                                                                                                                 | CD183           | G025H7     | 156 Gd          | Fluidigm        |
|                                                                                                                                                 | CD72            | 3F3        | 157 Gd          | Biolegend       |
|                                                                                                                                                 | CD23            | EBVCS-5    | 160 Gd          | Biolegend       |
|                                                                                                                                                 | CD365/TIM-1     | 1D12       | 161 Dy          | Biolegend       |
|                                                                                                                                                 | CD95/FASR       | DX2        | 164 Dy          | Biolegend       |
|                                                                                                                                                 | CD19            | HIB19      | 165 Ho          | Biolegend       |
|                                                                                                                                                 | CD197/CCR7      | G043H7     | 167 Er          | Fluidigm        |
|                                                                                                                                                 | CD73/NT5E1      | AD2        | 168 Er          | Biolegend       |
|                                                                                                                                                 | CD24            | ML5        | 169 Tm          | Biolegend       |
|                                                                                                                                                 | HLA-DR          | L243       | 170 Er          | Fluidigm        |
|                                                                                                                                                 | CD1d            | 51.1       | 171 Yb          | Biolegend       |
|                                                                                                                                                 | CD38            | HIT2       | 172 Yb          | Biolegend       |
|                                                                                                                                                 | CD1c            | L161       | 173 Yb          | Biolegend       |
|                                                                                                                                                 | IgL             | MHL-38     | 174 Yb          | BD Biosciences  |
|                                                                                                                                                 | CD305/LAIR1     | NKTA255    | 176 Yb          | Genetex         |
|                                                                                                                                                 | CD22            | HIB22      | 209 Bi          | Biolegend       |
|                                                                                                                                                 | Biotin          | 1D4-C5     | 113 In          | Biolegend       |
|                                                                                                                                                 | IgM             | polyclonal | 140 Ce          | Invitrogen      |
|                                                                                                                                                 | IL-4            | MP4-25D2   | 144 Nd          | Fluidigm        |
|                                                                                                                                                 | IgD             | IA6-2      | 146 Nd          | Biolegend       |
|                                                                                                                                                 | IgA             | polyclonal | 148 Nd          | Fluidigm        |
|                                                                                                                                                 | TNFa            | Mab11      | 152 Sm          | Fluidigm        |
|                                                                                                                                                 | IL-6            | MQ2-13A5   | 154 Sm          | Biolegend       |
|                                                                                                                                                 | Puromycin       | 12D10      | 158 Gd          | Miltenyi Biotec |
|                                                                                                                                                 | IL-35/IL-12 p35 | 27537      | 159 Tb          | RD Systems      |
|                                                                                                                                                 | IgG             | M1310G05   | 162 Dy          | Biolegend       |
|                                                                                                                                                 | Granzyme B      | 351927     | 163 Dy          | RD Systems      |
|                                                                                                                                                 | IL-10           | JES3-9D7   | 166 Er          | Biolegend       |
|                                                                                                                                                 | BrU             | 3D4        | 175 Lu          | BD Biosciences  |
| CD3                                                                                                                                             | OKT3            | Biotin     | Biolegend       |                 |
| CD7                                                                                                                                             | CD7-6B6         | Biotin     | Miltenyi Biotec |                 |
| CD15                                                                                                                                            | HI98            | Biotin     | Biolegend       |                 |
| CD33                                                                                                                                            | WM53            | Biotin     | Biolegend       |                 |
| CD56                                                                                                                                            | 5.1H11          | Biotin     | Biolegend       |                 |
| CD61                                                                                                                                            | Y2/51           | Biotin     | Miltenyi Biotec |                 |
| CD235ab                                                                                                                                         | HIR2            | Biotin     | Biolegend       |                 |

|                                                                                                           |               |            |                      |                 |
|-----------------------------------------------------------------------------------------------------------|---------------|------------|----------------------|-----------------|
| <b>Panel 2:</b> Sorting B cell subsets (Fig 4)                                                            | CD20          | 2H7        | PerCP-Cy5.5          | Biologend       |
|                                                                                                           | CD38          | HIT2       | FITC                 | Biologend       |
|                                                                                                           | CD24          | ML5        | Brilliant Violet 421 | Biologend       |
|                                                                                                           | CD45RB        | MEM-55     | PE                   | Biologend       |
|                                                                                                           | CD27          | O323       | Brilliant Violet 605 | Biologend       |
|                                                                                                           | CD95          | DX2        | Brilliant Violet 510 | Biologend       |
|                                                                                                           | CD11c         | Bu15       | Alexa Fluor 647      | Biologend       |
| <b>Panel 3:</b> Mass cytometry analysis of healthy donor peripheral B cells in sorting experiment (Fig 4) | CD45          | HI30       | 89 Y                 | Biologend       |
|                                                                                                           | CD14          | M5E2       | 113 In               | Biologend       |
|                                                                                                           | CD11b         | ICRF44     | 115 In               | Biologend       |
|                                                                                                           | CD9           | HI9a       | 141 Pr               | Biologend       |
|                                                                                                           | CD39/ENTPD1   | A1         | 142 Nd               | Biologend       |
|                                                                                                           | CD16          | 3G8        | 143 Nd               | Biologend       |
|                                                                                                           | CD69          | FN50       | 144 Nd               | Fluidigm        |
|                                                                                                           | CD45RB        | MEM-55     | 145 Nd               | Fluidigm        |
|                                                                                                           | CD20          | 2H7        | 147 Sm               | Fluidigm        |
|                                                                                                           | CD25          | BC96       | 149 Sm               | Biologend       |
|                                                                                                           | CD11c         | Bu15       | 150 Nd               | Biologend       |
|                                                                                                           | CD4           | RPA-T4     | 151 Eu               | Biologend       |
|                                                                                                           | TIGIT         | MAB7898    | 153 Eu               | Fluidigm        |
|                                                                                                           | CD27          | M-T271     | 155 Gd               | Biologend       |
|                                                                                                           | CD3           | UCHT1      | 156 Gd               | Biologend       |
|                                                                                                           | CD72          | 3F3        | 157 Gd               | Biologend       |
|                                                                                                           | CD95/FASR     | DX2        | 164 Dy               | Biologend       |
|                                                                                                           | CD19          | HIB19      | 165 Ho               | Biologend       |
|                                                                                                           | CD197/CCR7    | G043H7     | 167 Er               | Fluidigm        |
|                                                                                                           | CD24          | ML5        | 169 Tm               | Biologend       |
|                                                                                                           | HLA-DR        | L243       | 170 Er               | Fluidigm        |
|                                                                                                           | CD8a          | RPA-T8     | 171 Yb               | Biologend       |
|                                                                                                           | CD38          | HIT2       | 172 Yb               | Biologend       |
|                                                                                                           | CD73/NT5E     | AD2        | 173 Yb               | Biologend       |
|                                                                                                           | CD279/PD1     | EH12.2H7   | 174 Yb               | Fluidigm        |
|                                                                                                           | CD127         | A019D5     | 176 Yb               | Biologend       |
|                                                                                                           | CD5           | UCHT2      | 209 Bi               | Biologend       |
|                                                                                                           | IgM           | polyclonal | 140 Ce               | Invitrogen      |
|                                                                                                           | IgD           | IA6-2      | 146 Nd               | Biologend       |
|                                                                                                           | IgA           | polyclonal | 148 Nd               | Fluidigm        |
|                                                                                                           | TNFa          | Mab11      | 152 Sm               | Fluidigm        |
|                                                                                                           | IL-6          | MQ2-13A5   | 154 Sm               | Biologend       |
|                                                                                                           | Puromycin     | 12D10      | 158 Gd               | Miltenyi Biotec |
|                                                                                                           | IL35/IL12 p35 | 27537      | 159 Tb               | RD Systems      |
|                                                                                                           | CD152/CTLA4   | 14D3       | 160 Gd               | Invitrogen      |
|                                                                                                           | IL17A         | BL168      | 161 Dy               | Fluidigm        |
| IgG                                                                                                       | M1310G05      | 162 Dy     | Biologend            |                 |
| IL-10                                                                                                     | JES3-9D7      | 166 Er     | Biologend            |                 |
| IFNg                                                                                                      | B27           | 168 Er     | Fluidigm             |                 |
| BrU                                                                                                       | 3D4           | 175 Lu     | BD Biosciences       |                 |
| CFSE/FITC                                                                                                 | polyclonal    | 198 Pt     | Biologend            |                 |

**Table S4.** Antibody panel used for mass cytometry analysis. Related to STAR Methods.
